# Supplementary material for: Marine Polyether Phycotoxin Palytoxin Induces Apoptotic Cell Death via Mcl-1 and Bcl-2 Downregulation
Source: Mar Drugs. 2023 Apr 6;21(4):233. doi: 10.3390/md21040233 (PMC10143546; doi:10.3390/md21040233)

## Supplementary Materials

**Figure S1:** Calculated IC<sub>50</sub> values of different human cancer cell lines incubated with palytoxin at various concentrations between 2 and 8 hours. Data are the mean of SD  $\pm$  of three independent experiments.

### Leukemia cell lines:

| K562 | IC <sub>50</sub> (pM) |
|------|-----------------------|
| 2h   | 52.1 $\pm$ 5.9        |
| 4h   | 32.8 $\pm$ 7.8        |
| 6h   | 28.5 $\pm$ 7.3        |
| 8h   | 24.9 $\pm$ 5.0        |

| Jurkat | IC <sub>50</sub> (pM) |
|--------|-----------------------|
| 2h     | 12.8 $\pm$ 6.0        |
| 4h     | 13.5 $\pm$ 2.1        |
| 6h     | 8.8 $\pm$ 1.0         |
| 8h     | 8.7 $\pm$ 1.0         |

| U937 | IC <sub>50</sub> (pM) |
|------|-----------------------|
| 2h   | 24.8 $\pm$ 1.7        |
| 4h   | 27.3 $\pm$ 8.1        |
| 6h   | 14.0 $\pm$ 6.1        |
| 8h   | 9.0 $\pm$ 0.7         |

### Solid tumor cell lines:

| A549 | IC <sub>50</sub> (pM) |
|------|-----------------------|
| 2h   | 93 $\pm$ 9.8          |
| 4h   | 46.5 $\pm$ 5.8        |
| 6h   | 30.8 $\pm$ 3.7        |
| 8h   | 31.5 $\pm$ 2.7        |

| PC3 | IC <sub>50</sub> (pM) |
|-----|-----------------------|
| 2h  | 93.2 $\pm$ 20.4       |
| 4h  | 72.1 $\pm$ 9.9        |
| 6h  | 31.5 $\pm$ 2.8        |
| 8h  | 35.9 $\pm$ 4.6        |

| MCF7 | IC <sub>50</sub> (pM) |
|------|-----------------------|
| 2h   | 136.4 $\pm$ 30.9      |
| 4h   | 98.9 $\pm$ 9.2        |
| 6h   | 88.6 $\pm$ 7.8        |
| 8h   | 72.1 $\pm$ 8.8        |

| SH-SY5Y | IC <sub>50</sub> (pM) |
|---------|-----------------------|
| 2h      | 62.4 $\pm$ 7.3        |
| 4h      | 48.6 $\pm$ 5.9        |
| 6h      | 32.1 $\pm$ 3.6        |
| 8h      | 23.1 $\pm$ 3.9        |

**Figure S2:** Palytoxin down-regulates the expression of anti-apoptotic Bcl-2 family proteins in solid tumor cell lines. Western blot analysis of anti-apoptotic Bcl-2 family protein expression levels in A549 (lung cancer), PC3 (prostate cancer), MCF7 (breast cancer), and SH-SY5Y (neuroblastoma) cells.

#### A549

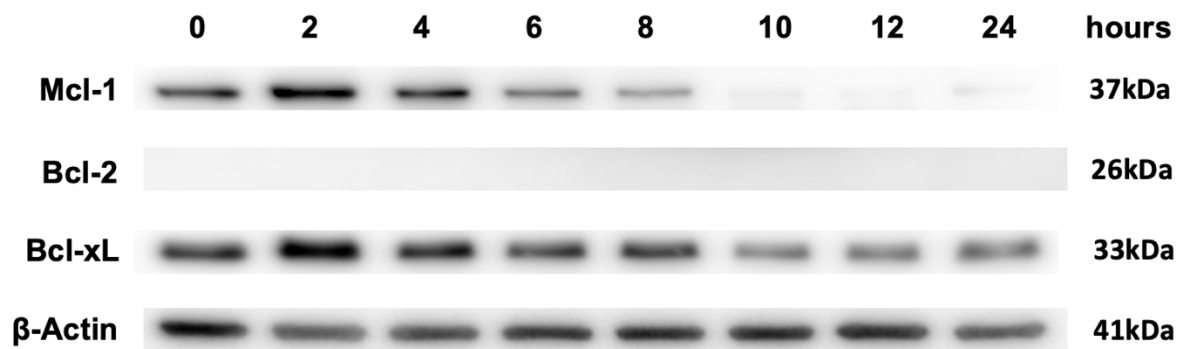

#### PC3

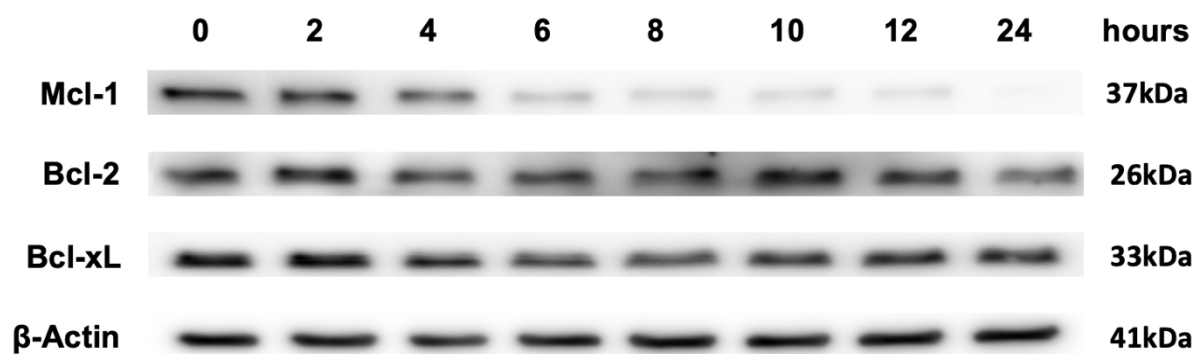

#### MCF7

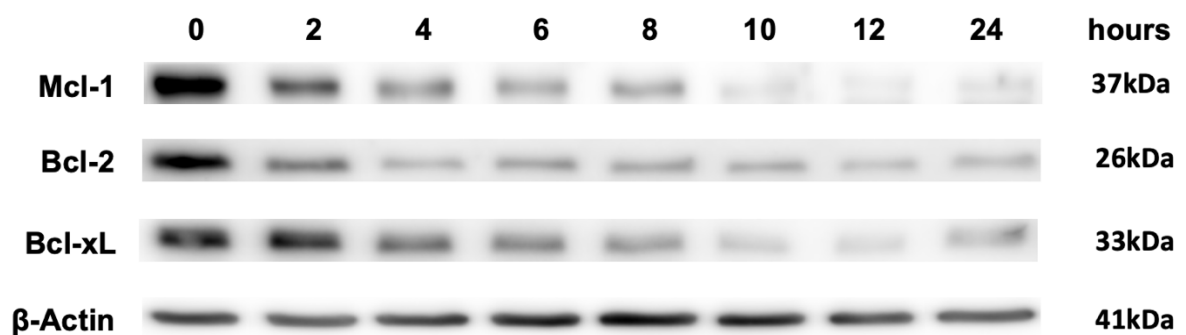

SH-SY5Y

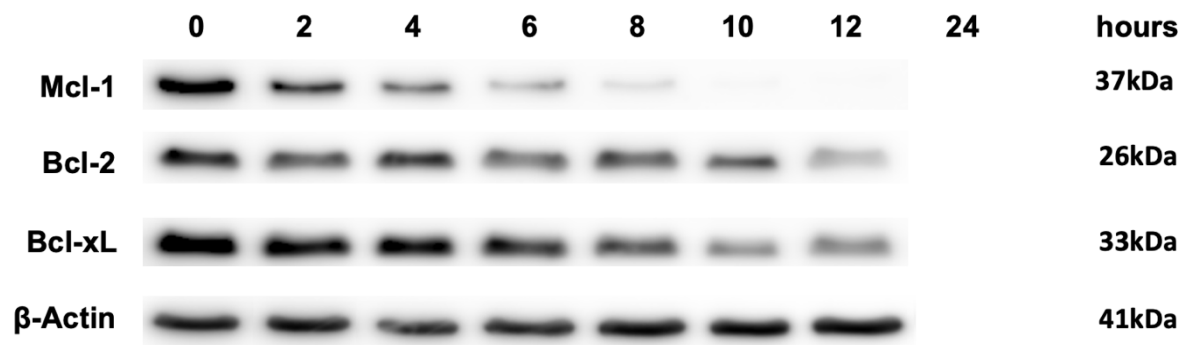

**Figure S3:** Palytoxin reduces the colony-forming ability in PC3 prostate cancer cells. Palytoxin showed an inhibitory effect on colony formation in a dose-dependent manner. All data represent the mean  $\pm$  SD. of three independent experiments. Statistical significance was assessed as \*\* $p < 0.01$  versus control.

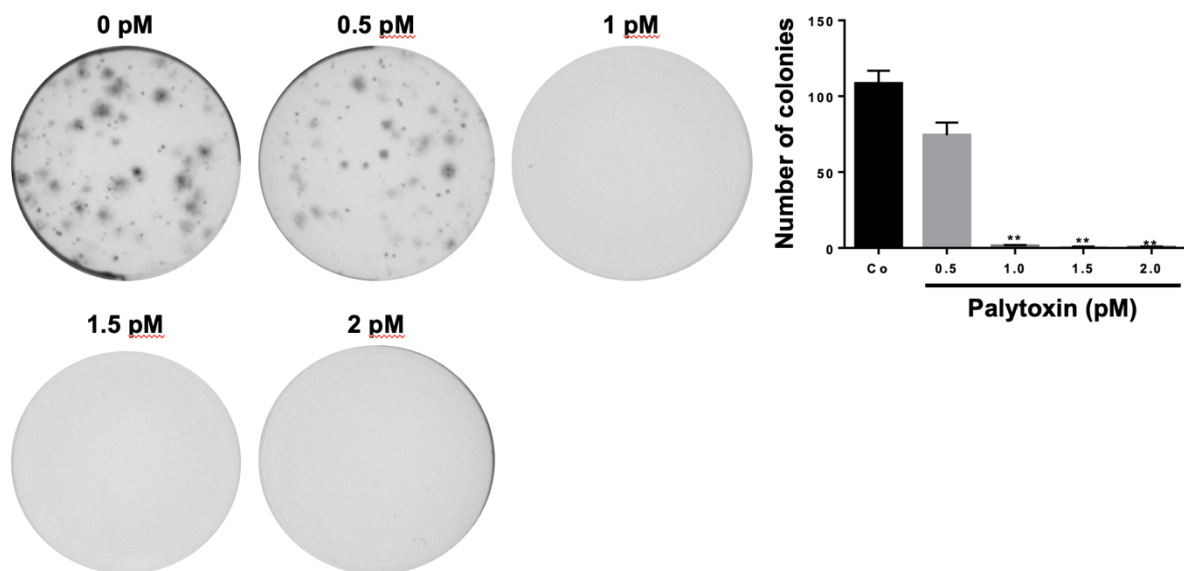

**Figure S4:** Palytoxin inhibited PC3 prostate cancer spheroid formation in a dose-dependent manner. Statistical significance was assessed as \* $p < 0.05$  and \*\*\* $p < 0.0001$  versus control.

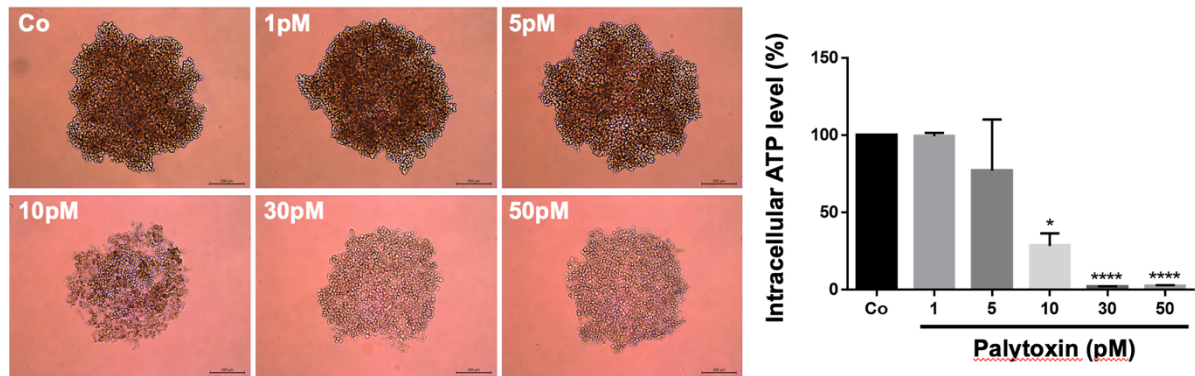

**Figure S5:** Palytoxin inhibits tumor-forming ability in *in vivo* zebrafish xenografts. Fluorescently-labeled leukemia cells were treated with palytoxin at 5, 10, and 30 pM for 6 hrs and then injected into the zebrafish yolk sac. A total of nine fish were obtained per condition. Top: bright field, middle: CM-Dil, bottom: merge. PBS injection was used as a control for injection toxicity.

### A. U937

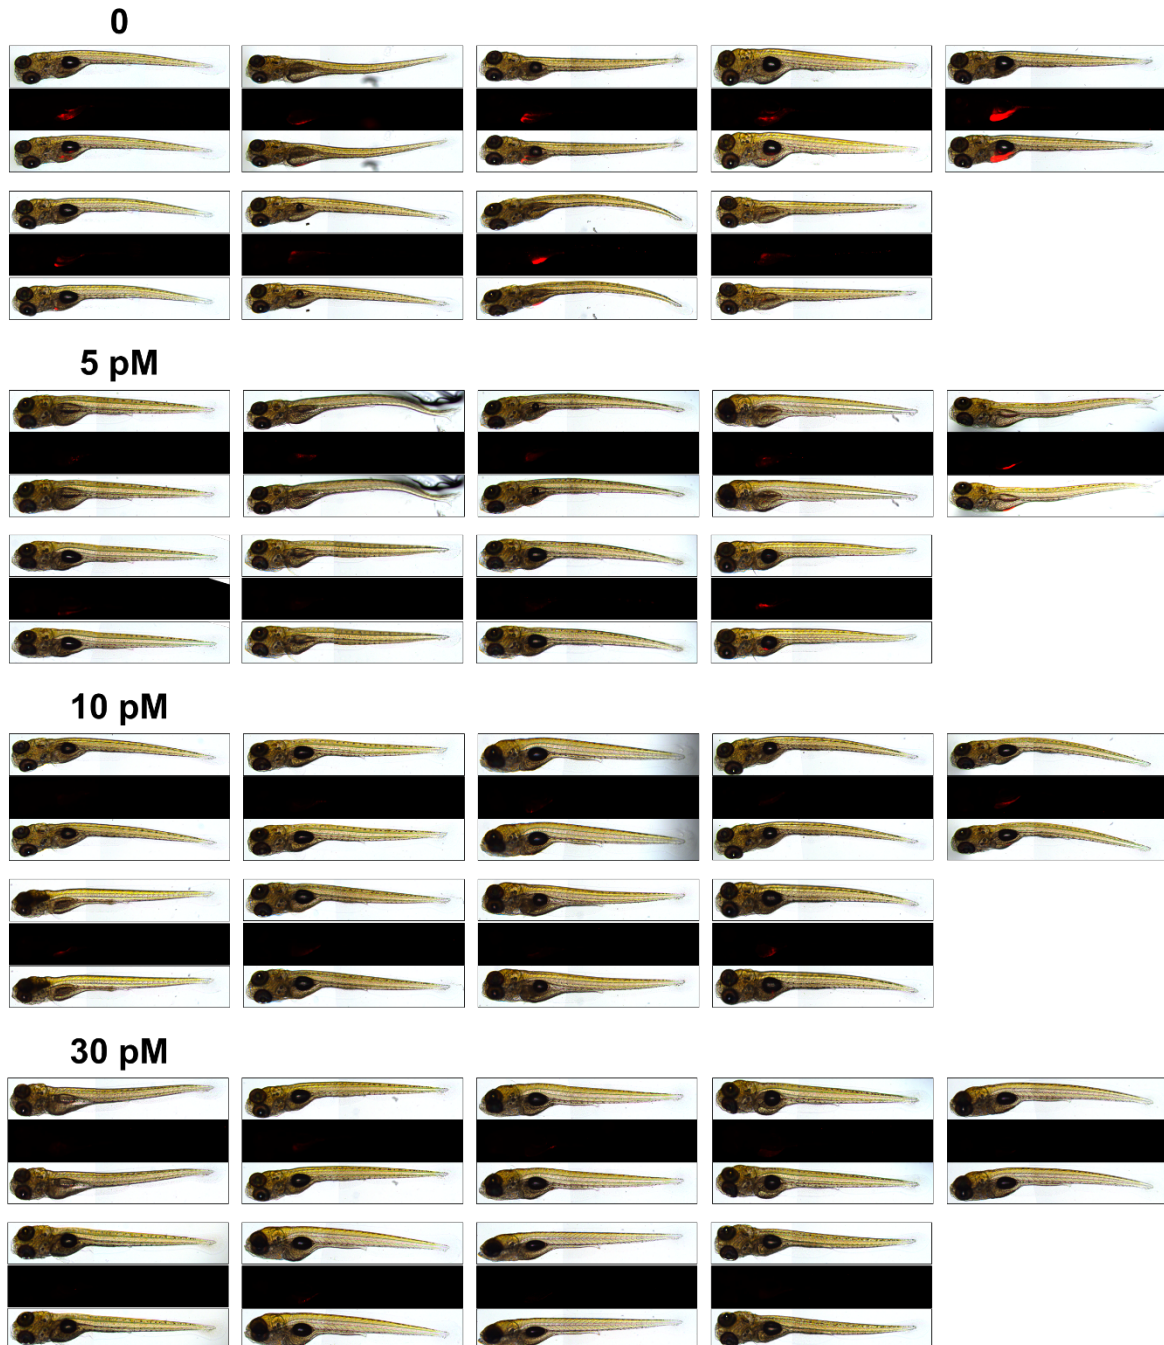

## B. HL60

0

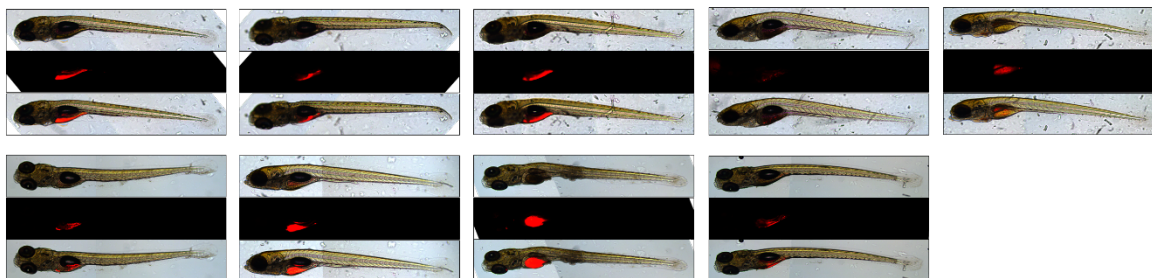

5 pM

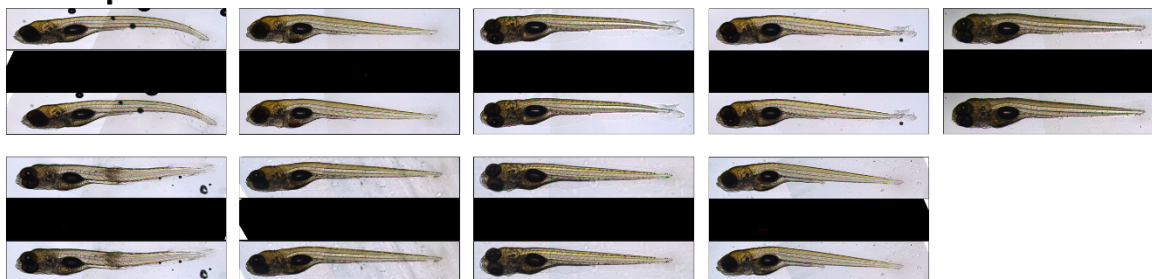

10 pM

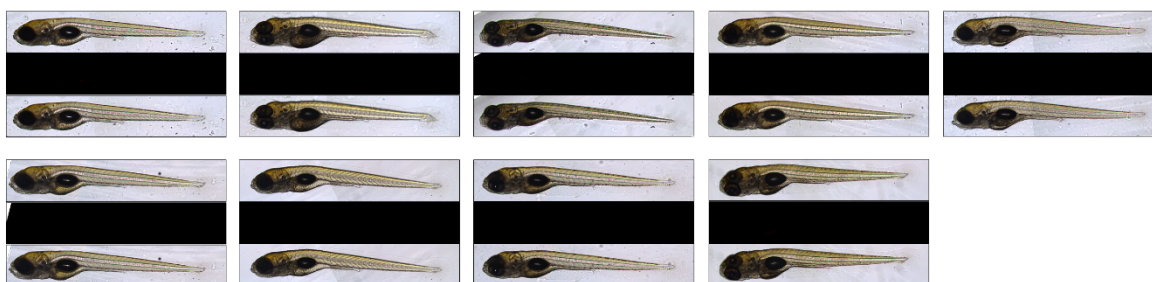

30 pM

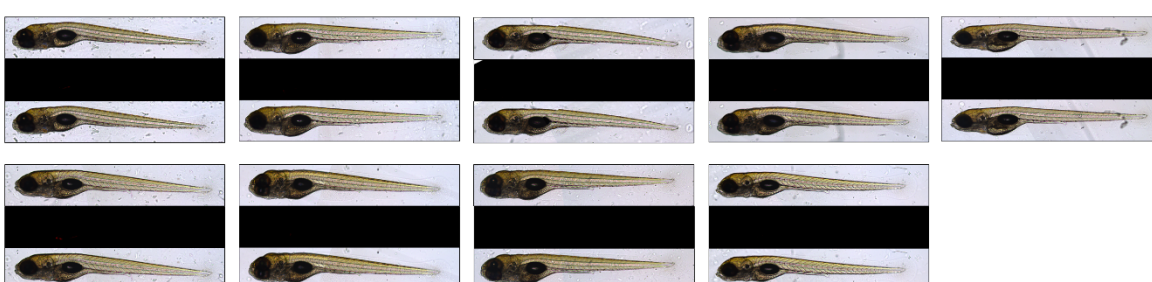

C. KG-1

0

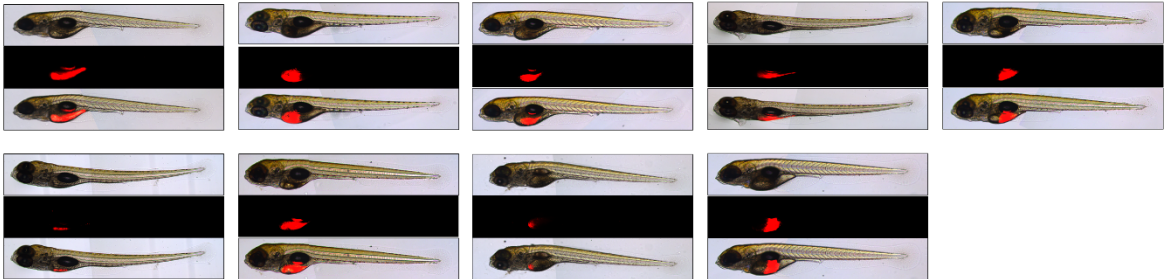

5 pM

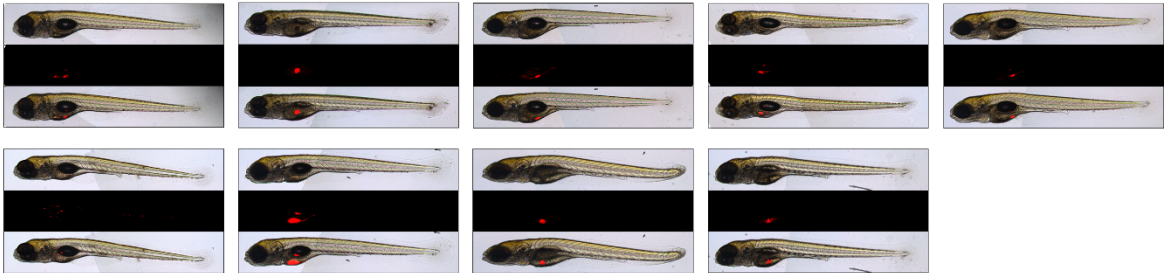

10 pM

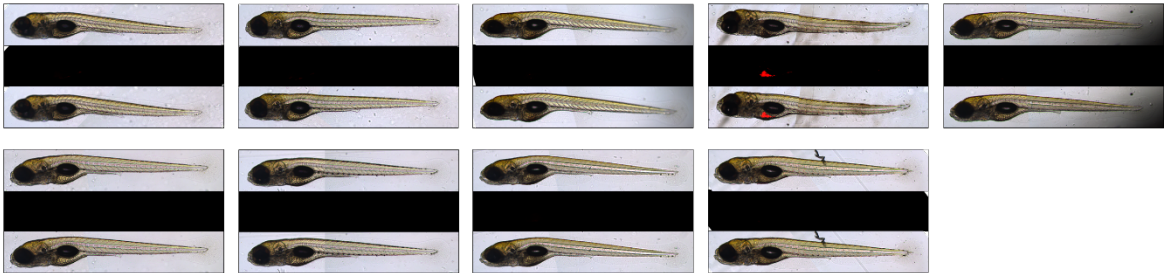

30 pM

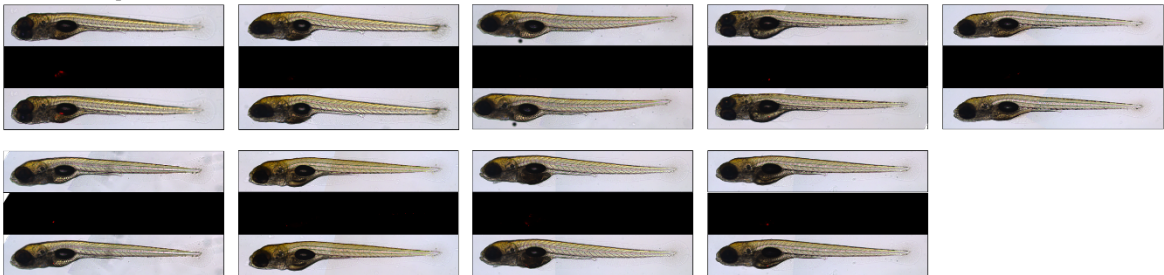

## D. THP1

0

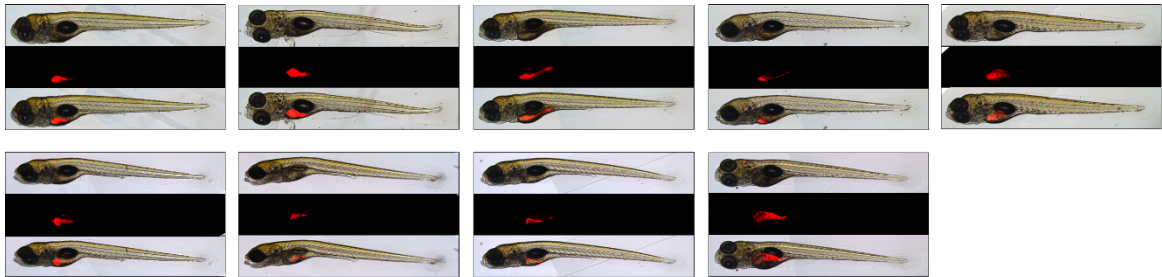

5 pM

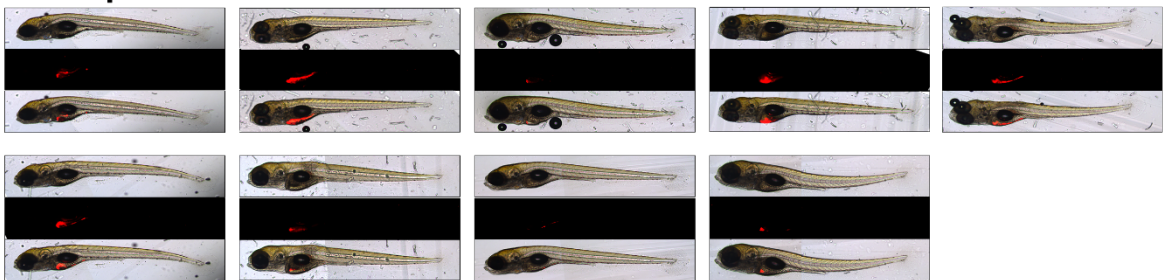

10 pM

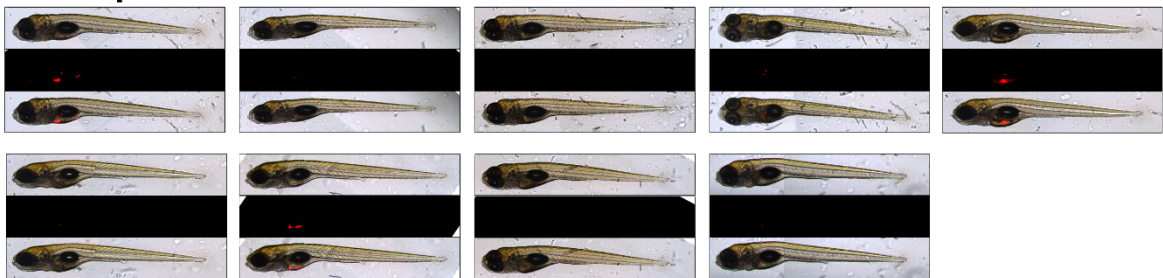

30 pM

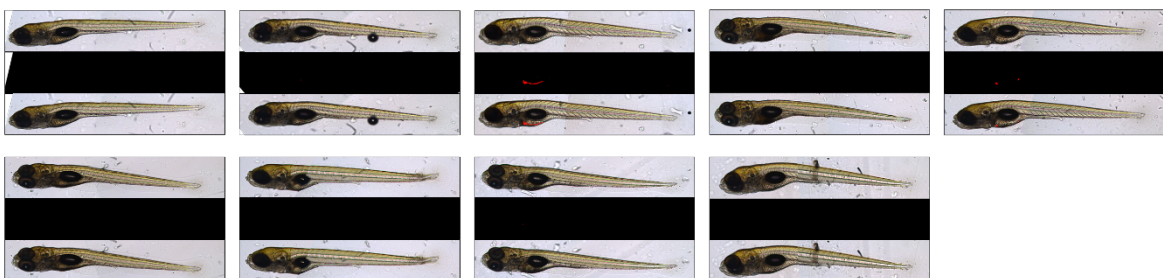

## E. K562

0

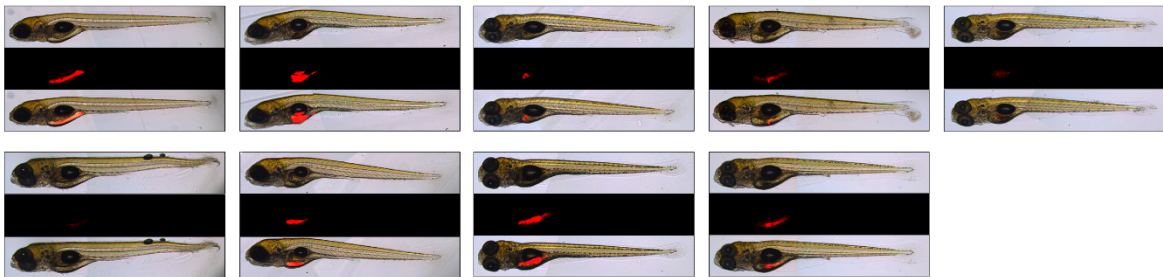

5 pM

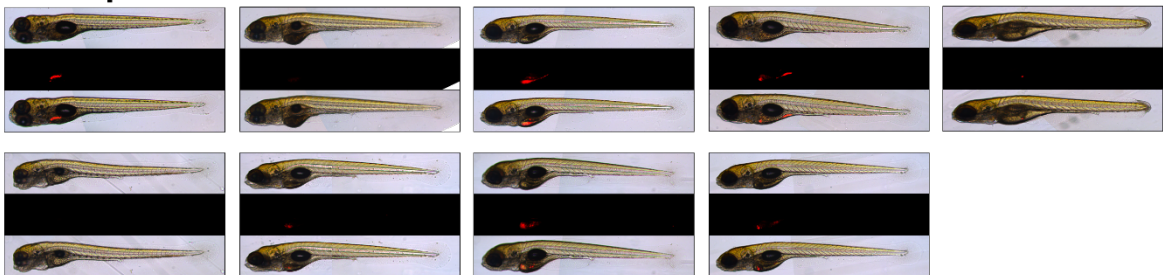

10 pM

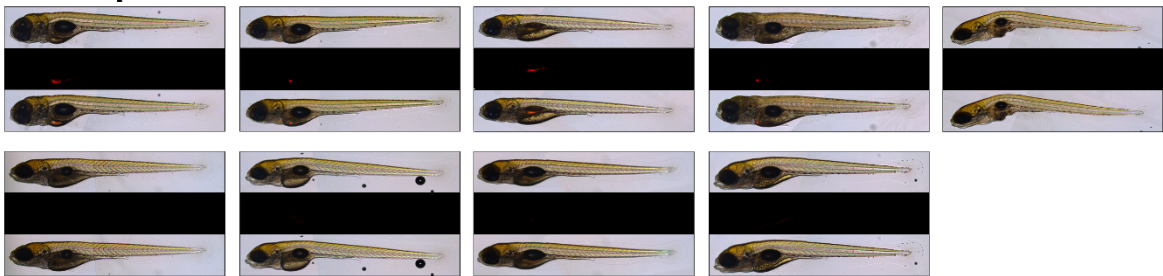

30 pM

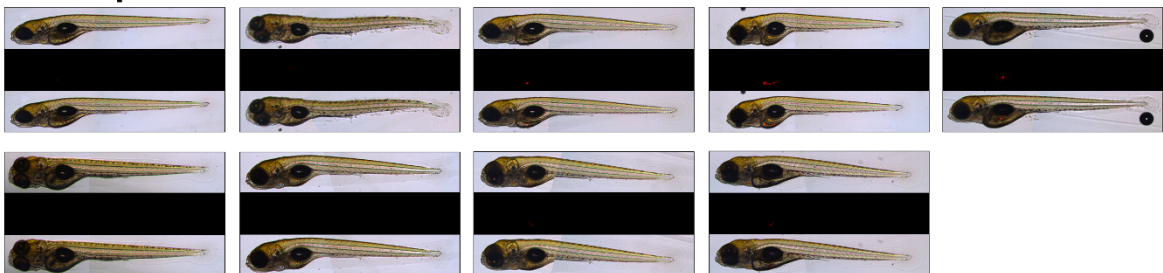

## F. K562IR

0

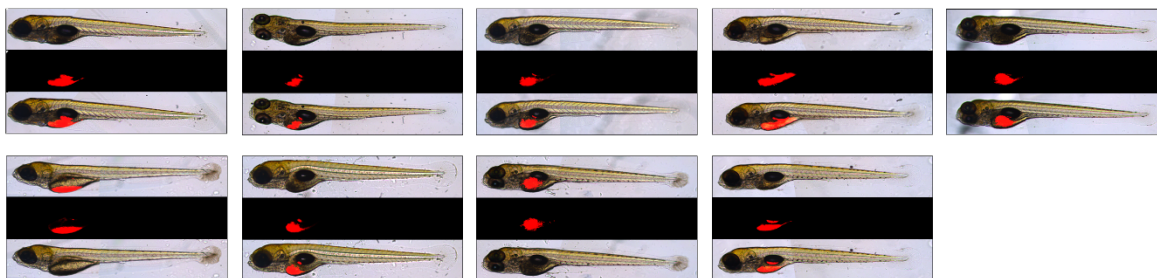

5 pM

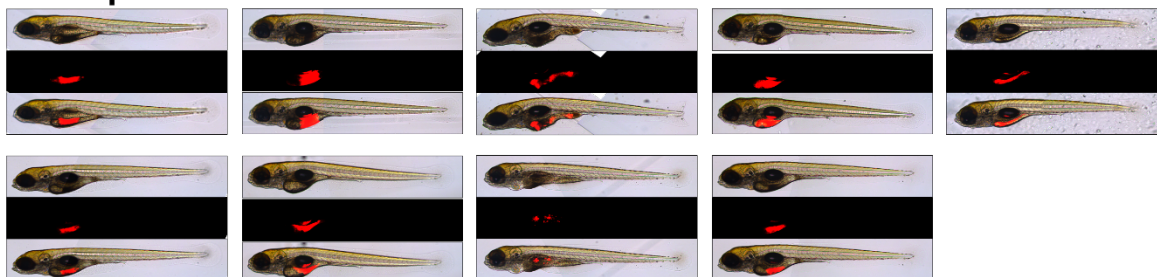

10 pM

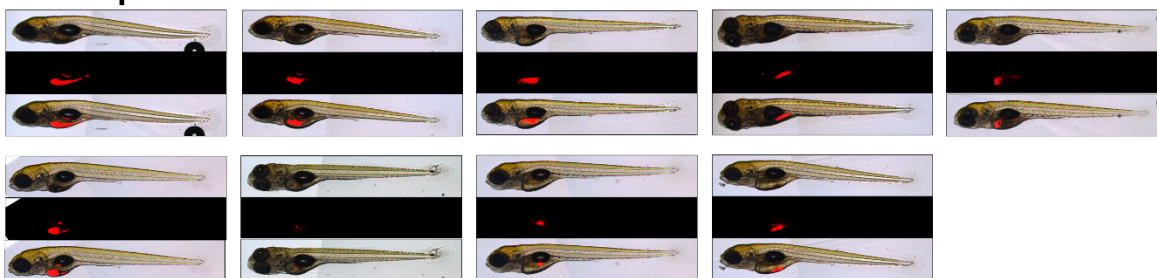

30 pM

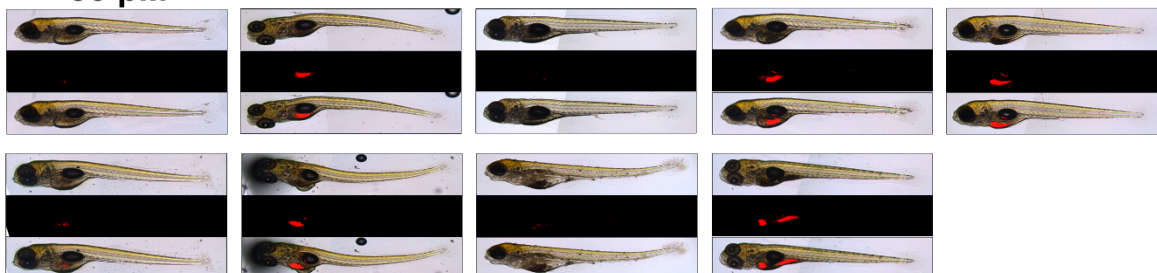

Supplement: Supplementary file 1 [file marinedrugs-21-00233-s001.zip › marinedrugs-2300114-supplementary.pdf]
